# Supplementary material
Source: PubMed Central journal article supplement (PMC4408933)
Supplement: NIHMS589876-supplement-Supplemental_information.pdf [file NIHMS589876-supplement-Supplemental_information.pdf]

Supplementary Table S1. Immune cell populations from Sprague-Dawley and FSL rats.

| antibody       | Sprague-Dawley |      | FSL        |      | p - value |
|----------------|----------------|------|------------|------|-----------|
|                | % of cells     | SEM  | % of cells | SEM  |           |
| CD3+           | 5.62           | 0.26 | 6.83       | 0.50 | 0.05      |
| CD161a+        | 2.28           | 0.29 | 2.56       | 0.24 | 0.47      |
| CD11b/c+       | 82.36          | 1.93 | 83.24      | 1.02 | 0.69      |
| CD45+/CD11b/c+ | 3.15           | 0.31 | 3.67       | 0.20 | 0.19      |

Supplementary Table S2. All differentially regulated probe sets derived from the microarray analysis.

| Probe.Set.ID                    | Gene.Title                                                                                                                                          | Gene.Symbol                  | Log2(FC) |
|---------------------------------|-----------------------------------------------------------------------------------------------------------------------------------------------------|------------------------------|----------|
| <b>UP-REGULATED TRANSCRIPTS</b> |                                                                                                                                                     |                              |          |
| 1368826_at                      | catechol-O-methyltransferase                                                                                                                        | Comt                         | 6.14     |
| 1371970_at                      | family with sequence similarity 111, member A                                                                                                       | Fam111a                      | 5.51     |
| 1383211_at                      | ---                                                                                                                                                 | ---                          | 5.26     |
| 1395020_at                      | pleckstrin homology domain containing, family H (with MyTH4 domain) member 1                                                                        | Plekhh1                      | 5.25     |
| 1387839_at                      | RT1 class Ib gene, H2-TL-like, grc region (N1) /// RT1 class Ib gene, H2-TL-like, grc region(N2) /// RT1 class Ib gene, H2-TL-like, grc region (N3) | RT1-N1 /// RT1-N2 /// RT1-N3 | 4.62     |
| 1391809_at                      | ---                                                                                                                                                 | ---                          | 4.25     |
| 1397164_at                      | ---                                                                                                                                                 | ---                          | 4.21     |
| 1369144_a_at                    | potassium voltage gated channel, Shal-related family, member 3                                                                                      | Kcnd3                        | 3.61     |
| 1395703_at                      | ---                                                                                                                                                 | ---                          | 3.53     |
| 1390777_at                      | sterol-C5-desaturase (ERG3 delta-5-desaturase homolog, S. cerevisiae)-like                                                                          | Sc5dl                        | 2.69     |
| 1393842_at                      | coiled-coil domain containing 77                                                                                                                    | Ccdc77                       | 2.54     |
| 1380577_at                      | ATP-binding cassette, sub-family G (WHITE), member 2                                                                                                | Abcg2                        | 2.53     |
| 1378346_at                      | lipin 2                                                                                                                                             | Lpin2                        | 2.27     |
| 1387926_at                      | sterol-C5-desaturase (ERG3 delta-5-desaturase homolog, S. cerevisiae)-like                                                                          | Sc5dl                        | 2.25     |
| 1383864_at                      | ---                                                                                                                                                 | ---                          | 2.17     |
| 1396368_at                      | ---                                                                                                                                                 | ---                          | 2.14     |
| 1380948_at                      | ---                                                                                                                                                 | ---                          | 1.76     |
| 1390284_at                      | coiled-coil domain containing 77                                                                                                                    | Ccdc77                       | 1.75     |
| 1396782_at                      | ---                                                                                                                                                 | ---                          | 1.72     |
| 1384717_at                      | ---                                                                                                                                                 | ---                          | 1.71     |
| 1377056_at                      | ---                                                                                                                                                 | ---                          | 1.70     |
| 1372531_at                      | PTPRF interacting protein, binding protein 2 (liprin beta 2)                                                                                        | Ppfibp2                      | 1.67     |
| 1396441_at                      | ---                                                                                                                                                 | ---                          | 1.66     |
| 1384996_at                      | ---                                                                                                                                                 | ---                          | 1.65     |
| 1396240_at                      | ---                                                                                                                                                 | ---                          | 1.65     |
| 1368366_at                      | camello-like 1                                                                                                                                      | Cml1                         | 1.62     |
| 1374743_at                      | InaD-like (Drosophila)                                                                                                                              | Inadl                        | 1.58     |
| 1396743_at                      | ---                                                                                                                                                 | ---                          | 1.58     |
| 1396917_at                      | ---                                                                                                                                                 | ---                          | 1.57     |
| 1397555_at                      | similar to leucine zipper protein 2                                                                                                                 | RGD1563838                   | 1.56     |
| 1392586_at                      | MU-2/AP1M2 domain containing, death-inducing                                                                                                        | Mudeng                       | 1.55     |

|              |                                                                         |            |      |
|--------------|-------------------------------------------------------------------------|------------|------|
| 1389553_at   | C-type lectin domain family 4, member a3                                | Clec4a3    | 1.54 |
| 1393084_at   | HRAS-like suppressor                                                    | Hrasls     | 1.53 |
| 1388506_at   | desmoplakin                                                             | Dsp        | 1.44 |
| 1374934_at   | ---                                                                     | ---        | 1.43 |
| 1367762_at   | somatostatin                                                            | Sst        | 1.38 |
| 1390929_at   | ---                                                                     | ---        | 1.36 |
| 1380264_at   | ---                                                                     | ---        | 1.34 |
| 1385601_at   | FSHD region gene 1-like                                                 | Frg11      | 1.33 |
| 1372917_at   | peptidyl-tRNA hydrolase 2                                               | Pth2       | 1.31 |
| 1389734_x_at | histocompatibility 2, T region locus 24                                 | H2-T24     | 1.29 |
| 1388578_at   | similar to B0432.8                                                      | LOC289378  | 1.27 |
| 1391776_at   | COX assembly mitochondrial protein homolog ( <i>S. cerevisiae</i> )     | Cmc1       | 1.27 |
| 1376771_at   | protein phosphatase 1 (formerly 2C)-like                                | Ppm11      | 1.24 |
| 1388182_at   | DNA primase, p49 subunit                                                | Prim1      | 1.24 |
| 1396381_at   | hypothetical protein LOC688736                                          | MGC116202  | 1.23 |
| 1368589_at   | protein tyrosine phosphatase, receptor type, J                          | Ptpj       | 1.21 |
| 1371595_at   | ---                                                                     | ---        | 1.19 |
| 1382755_at   | ---                                                                     | ---        | 1.17 |
| 1368621_at   | aquaporin 9                                                             | Aqp9       | 1.12 |
| 1374090_at   | similar to DKFZP547E1010 protein                                        | LOC361990  | 1.12 |
| 1380552_at   | ---                                                                     | ---        | 1.11 |
| 1388378_at   | eukaryotic translation initiation factor 3, subunit C                   | Eif3c      | 1.11 |
| 1382134_at   | olfactomedin-like 1                                                     | Olfml1     | 1.08 |
| 1379304_at   | Prkr interacting protein 1 (IL11 inducible)                             | Prkrip1    | 1.08 |
| 1369743_a_at | purinergic receptor P2X, ligand-gated ion channel 4                     | P2rx4      | 1.08 |
| 1395719_at   | Tu translation elongation factor, mitochondrial                         | Tufm       | 1.06 |
| 1387256_at   | a disintegrin and metallopeptidase domain 1a                            | Adam1a     | 1.05 |
| 1398679_at   | ---                                                                     | ---        | 1.05 |
| 1377451_at   | Similar to c-Mpl binding protein                                        | RGD1305704 | 1.04 |
| 1390434_at   | TNFRSF1A-associated via death domain                                    | Tradd      | 1.02 |
| 1368064_a_at | dopa decarboxylase (aromatic L-amino acid decarboxylase)                | Ddc        | 1.00 |
| 1372293_at   | Similar to RIKEN cDNA 1110038F21                                        | RGD1562059 | 0.98 |
| 1372119_at   | ubiquitin-like modifier activating enzyme 5                             | Uba5       | 0.96 |
| 1371770_at   | prefoldin 6                                                             | Pfdn6      | 0.96 |
| 1388617_at   | biphenyl hydrolase-like (serine hydrolase)                              | Bphl       | 0.94 |
| 1397415_at   | spastic paraplegia 3A homolog (human)                                   | Spg3a      | 0.94 |
| 1395542_at   | ---                                                                     | ---        | 0.91 |
| 1395393_at   | ---                                                                     | ---        | 0.91 |
| 1383479_at   | ---                                                                     | ---        | 0.90 |
| 1372027_at   | ---                                                                     | ---        | 0.90 |
| 1370005_at   | cytochrome b5 type B (outer mitochondrial membrane)                     | Cyb5b      | 0.90 |
| 1374992_at   | ---                                                                     | ---        | 0.89 |
| 1397628_at   | similar to RIKEN cDNA 2900092E17                                        | RGD1305592 | 0.88 |
| 1390185_at   | decapping enzyme, scavenger                                             | Dcps       | 0.88 |
| 1370061_at   | RAB3B, member RAS oncogene family                                       | Rab3b      | 0.88 |
| 1389166_at   | calcium and integrin binding family member 2                            | Cib2       | 0.88 |
| 1378163_at   | gremlin 2, cysteine knot superfamily, homolog ( <i>Xenopus laevis</i> ) | Grem2      | 0.87 |
| 1379717_at   | similar to ATP-binding cassette, sub-family G (WHITE), member 3         | LOC360997  | 0.87 |

|              |                                                                                                                                                                                                   |                                     |      |
|--------------|---------------------------------------------------------------------------------------------------------------------------------------------------------------------------------------------------|-------------------------------------|------|
| 1370576_at   | dynein cytoplasmic 1 light intermediate chain 1                                                                                                                                                   | Dync1li1                            | 0.87 |
| 1370144_at   | GTP binding protein 4 /// similar to Nucleolar GTP-binding protein 1 (Chronic renal failure gene protein) (GTP-binding protein NGB) /// similar to isopentenyl diphosphate delta-isomerase type 2 | Gtpbp4 /// LOC689842 /// RGD1560805 | 0.86 |
| 1392149_at   | ---                                                                                                                                                                                               | ---                                 | 0.85 |
| 1370956_at   | decorin                                                                                                                                                                                           | Dcn                                 | 0.83 |
| 1383598_at   | WD repeat domain 91                                                                                                                                                                               | Wdr91                               | 0.83 |
| 1379641_at   | Radixin                                                                                                                                                                                           | Rdx                                 | 0.83 |
| 1370831_at   | monoglyceride lipase                                                                                                                                                                              | Mgll                                | 0.80 |
| 1386145_at   | ---                                                                                                                                                                                               | ---                                 | 0.80 |
| 1373288_at   | suppression of tumorigenicity 5                                                                                                                                                                   | St5                                 | 0.80 |
| 1389360_at   | FXVD domain-containing ion transport regulator 3                                                                                                                                                  | Fxyd3                               | 0.79 |
| 1379338_at   | phosphoglucomutase 2-like 1                                                                                                                                                                       | Pgm2l1                              | 0.79 |
| 1383058_at   | ---                                                                                                                                                                                               | ---                                 | 0.79 |
| 1388153_at   | acyl-CoA synthetase long-chain family member 1                                                                                                                                                    | Acs1l                               | 0.79 |
| 1398303_s_at | tropomyosin 3, gamma                                                                                                                                                                              | Tpm3                                | 0.79 |
| 1369735_at   | growth arrest specific 6                                                                                                                                                                          | Gas6                                | 0.78 |
| 1378394_at   | metallophosphoesterase 1                                                                                                                                                                          | Mppe1                               | 0.77 |
| 1394625_at   | transmembrane protein 144                                                                                                                                                                         | Tmem144                             | 0.77 |
| 1382193_at   | CDGSH iron sulfur domain 2                                                                                                                                                                        | Cisd2                               | 0.76 |
| 1387370_at   | tropomodulin 1                                                                                                                                                                                    | Tmod1                               | 0.76 |
| 1384504_at   | membrane associated guanylate kinase, WW and PDZ domain containing 1                                                                                                                              | Magi1                               | 0.76 |
| 1394517_at   | ---                                                                                                                                                                                               | ---                                 | 0.75 |
| 1376723_a_at | ---                                                                                                                                                                                               | ---                                 | 0.75 |
| 1383722_at   | proline synthetase co-transcribed homolog (bacterial)                                                                                                                                             | Prosc                               | 0.75 |
| 1371251_at   | galactose-1-phosphate uridylyltransferase                                                                                                                                                         | Galt                                | 0.74 |
| 1379826_at   | coiled-coil domain containing 107                                                                                                                                                                 | Ccdc107                             | 0.73 |
| 1392257_at   | MIS12, MIND kinetochore complex component, homolog (yeast)                                                                                                                                        | Mis12                               | 0.73 |
| 1370829_at   | farnesyltransferase, CAAX box, beta                                                                                                                                                               | Fntb                                | 0.72 |
| 1369989_at   | pyridoxine 5'-phosphate oxidase                                                                                                                                                                   | Pnpo                                | 0.72 |
| 1368658_at   | ciliary neurotrophic factor                                                                                                                                                                       | Cntf                                | 0.71 |
| 1383624_at   | similar to hypothetical protein LOC284018 isoform b                                                                                                                                               | RGD1565033                          | 0.70 |
| 1385093_at   | similar to hypothetical protein LOC284018 isoform b                                                                                                                                               | RGD1565033                          | 0.69 |
| 1393073_at   | ---                                                                                                                                                                                               | ---                                 | 0.69 |
| 1369651_at   | Thy-1 cell surface antigen                                                                                                                                                                        | Thy1                                | 0.67 |
| 1369102_at   | mitogen activated protein kinase 10                                                                                                                                                               | Mapk10                              | 0.67 |
| 1375719_s_at | cadherin 13                                                                                                                                                                                       | Cdh13                               | 0.67 |
| 1390977_at   | suppression of tumorigenicity 7-like                                                                                                                                                              | St7l                                | 0.67 |
| 1385546_at   | IQ motif and WD repeats 1                                                                                                                                                                         | Iqwd1                               | 0.67 |
| 1391595_at   | La ribonucleoprotein domain family, member 6                                                                                                                                                      | Larp6                               | 0.66 |
| 1385887_at   | ---                                                                                                                                                                                               | ---                                 | 0.66 |
| 1381871_at   | ---                                                                                                                                                                                               | ---                                 | 0.66 |
| 1374756_at   | similar to 1500031N24Rik protein                                                                                                                                                                  | RGD1311188                          | 0.66 |
| 1391079_at   | ---                                                                                                                                                                                               | ---                                 | 0.66 |
| 1371130_at   | solute carrier family 1 (glial high affinity glutamate transporter), member 3                                                                                                                     | Slc1a3                              | 0.66 |
| 1372901_at   | NHL repeat containing 3                                                                                                                                                                           | Nhlrc3                              | 0.66 |
| 1393480_at   | protein phosphatase 1, regulatory (inhibitor) subunit 2                                                                                                                                           | Ppp1r2                              | 0.66 |

|            |                                                             |          |      |
|------------|-------------------------------------------------------------|----------|------|
| 1367612_at | microsomal glutathione S-transferase 1                      | Mgst1    | 0.65 |
| 1373672_at | Serine (or cysteine) peptidase inhibitor, clade B, member 9 | Serpinb9 | 0.64 |
| 1392992_at | ---                                                         | ---      | 0.63 |
| 1380561_at | isoleucyl-tRNA synthetase 2, mitochondrial                  | Iars2    | 0.63 |
| 1383416_at | Acetyl-coenzyme A acetyltransferase 1                       | Acat1    | 0.62 |
| 1376669_at | ---                                                         | ---      | 0.59 |

#### DOWN-REGULATED TRANSCRIPTS

|              |                                                                                     |                      |       |
|--------------|-------------------------------------------------------------------------------------|----------------------|-------|
| 1391262_at   | similar to SUMO/sentrin specific protease 5 /// SUMO/sentrin specific protease 5    | RGD1564247 /// Semp5 | -6.21 |
| 1393623_at   | tripartite motif-containing 25                                                      | TRIM25               | -5.72 |
| 1394620_at   | ---                                                                                 | ---                  | -5.46 |
| 1383449_at   | ---                                                                                 | ---                  | -5.31 |
| 1376302_at   | tripartite motif-containing 25                                                      | TRIM25               | -4.93 |
| 1397439_at   | similar to diacylglycerol kinase epsilon                                            | LOC497978            | -4.81 |
| 1377133_at   | Hypothetical protein LOC680687                                                      | LOC680687            | -4.81 |
| 1372120_at   | ubiquitin-like modifier activating enzyme 5                                         | Uba5                 | -3.98 |
| 1377442_at   | HtrA serine peptidase 4                                                             | HTRA4                | -3.81 |
| 1368943_at   | ribonuclease, RNase A family 4                                                      | Rnase4               | -3.72 |
| 1395126_at   | Fc receptor-like S, scavenger receptor                                              | Fcrls                | -3.66 |
| 1388071_x_at | RT1 class Ib, locus Aw2                                                             | RT1-Aw2              | -3.43 |
| 1392954_at   | ---                                                                                 | ---                  | -3.40 |
| 1392716_at   | ---                                                                                 | ---                  | -3.33 |
| 1374583_at   | ---                                                                                 | ---                  | -3.28 |
| 1390562_s_at | ---                                                                                 | ---                  | -3.17 |
| 1381770_at   | ---                                                                                 | ---                  | -3.11 |
| 1376011_at   | ---                                                                                 | ---                  | -3.03 |
| 1371475_at   | ribonuclease, RNase A family 4                                                      | Rnase4               | -2.92 |
| 1381840_at   | ---                                                                                 | ---                  | -2.82 |
| 1388060_at   | synaptotagmin XII                                                                   | Syt12                | -2.74 |
| 1377422_at   | Myotubularin related protein 1                                                      | Mtmr1                | -2.63 |
| 1390399_at   | cAMP responsive element binding protein-like 2                                      | Crebl2               | -2.63 |
| 1389533_at   | fibulin 2                                                                           | Fbln2                | -2.59 |
| 1378003_at   | leucine rich repeat containing 8 family, member B                                   | Lrrc8b               | -2.55 |
| 1397364_at   | ---                                                                                 | ---                  | -2.40 |
| 1388164_at   | histocompatibility 2, T region locus 23                                             | H2-T23               | -2.35 |
| 1376685_at   | ---                                                                                 | ---                  | -2.32 |
| 1384226_at   | ---                                                                                 | ---                  | -2.28 |
| 1370176_at   | trafficking protein, kinesin binding 2                                              | Trak2                | -2.25 |
| 1392202_at   | ---                                                                                 | ---                  | -2.22 |
| 1374959_at   | NAD(P)H dehydrogenase, quinone 2                                                    | Nqo2                 | -2.17 |
| 1367749_at   | lumican                                                                             | Lum                  | -2.17 |
| 1388212_a_at | histocompatibility 2, T region locus 23 /// histocompatibility 2, T region locus 24 | H2-T23 /// H2-T24    | -2.14 |
| 1394803_at   | vacuolar protein sorting 52 homolog (S. cerevisiae)                                 | Vps52                | -2.13 |
| 1383075_at   | cyclin D1                                                                           | Cend1                | -2.12 |
| 1388493_at   | EGFR-coamplified and overexpressed protein                                          | Ecop                 | -2.12 |
| 1369202_at   | myxovirus (influenza virus) resistance 2                                            | Mx2                  | -2.07 |

|              |                                                                                     |                   |       |
|--------------|-------------------------------------------------------------------------------------|-------------------|-------|
| 1385521_at   | ---                                                                                 | ---               | -2.05 |
| 1394477_at   | similar to nucleolar protein with MIF4G domain 1                                    | LOC682058         | -2.04 |
| 1368753_at   | calcium/calmodulin-dependent protein kinase kinase 2, beta                          | Camkk2            | -1.98 |
| 1398229_at   | ---                                                                                 | ---               | -1.98 |
| 1380386_at   | ---                                                                                 | ---               | -1.95 |
| 1370667_at   | solute carrier family 9 (sodium/hydrogen exchanger), member 4                       | Slc9a4            | -1.93 |
| 1373410_at   | myocyte enhancer factor 2C                                                          | Mef2c             | -1.92 |
| 1390063_at   | microfibrillar-associated protein 3                                                 | Mfap3             | -1.90 |
| 1394425_at   | ---                                                                                 | ---               | -1.87 |
| 1384126_a_at | ---                                                                                 | ---               | -1.87 |
| 1387376_at   | aldehyde oxidase 1                                                                  | Aox1              | -1.84 |
| 1391202_at   | ---                                                                                 | ---               | -1.78 |
| 1382349_at   | TBCC domain containing 1                                                            | Tbccd1            | -1.76 |
| 1397795_at   | Advillin                                                                            | Avil              | -1.72 |
| 1390810_at   | ---                                                                                 | ---               | -1.70 |
| 1379747_at   | Protease, serine, 35                                                                | Prss35            | -1.69 |
| 1397844_at   | ---                                                                                 | ---               | -1.68 |
| 1397706_at   | ---                                                                                 | ---               | -1.68 |
| 1398097_at   | ---                                                                                 | ---               | -1.65 |
| 1380431_at   | similar to KIAA0564 protein                                                         | RGD1308772        | -1.62 |
| 1374786_at   | ---                                                                                 | ---               | -1.59 |
| 1377015_at   | ---                                                                                 | ---               | -1.57 |
| 1383242_a_at | ---                                                                                 | ---               | -1.56 |
| 1379188_at   | AT rich interactive domain 2 (Arid-rfx like)                                        | Arid2             | -1.55 |
| 1391673_at   | Rho GTPase activating protein 20                                                    | Arhgap20          | -1.52 |
| 1398445_at   | ---                                                                                 | ---               | -1.50 |
| 1371123_x_at | histocompatibility 2, T region locus 23 /// histocompatibility 2, T region locus 24 | H2-T23 /// H2-T24 | -1.49 |
| 1394511_at   | myb-like, SWIRM and MPN domains 1                                                   | Mysm1             | -1.47 |
| 1378802_at   | pyridine nucleotide-disulphide oxidoreductase domain 2                              | Pyroxd2           | -1.46 |
| 1379899_at   | ---                                                                                 | ---               | -1.46 |
| 1377475_at   | ---                                                                                 | ---               | -1.45 |
| 1391047_at   | ---                                                                                 | ---               | -1.44 |
| 1396330_at   | ---                                                                                 | ---               | -1.39 |
| 1383393_at   | ---                                                                                 | ---               | -1.37 |
| 1377051_at   | ---                                                                                 | ---               | -1.36 |
| 1389469_at   | chromodomain helicase DNA binding protein 1-like                                    | Chd11             | -1.36 |
| 1375099_at   | ---                                                                                 | ---               | -1.32 |
| 1375519_at   | globin, alpha                                                                       | LOC287167         | -1.31 |
| 1398411_at   | ---                                                                                 | ---               | -1.30 |
| 1375986_at   | ---                                                                                 | ---               | -1.30 |
| 1396855_at   | ---                                                                                 | ---               | -1.29 |
| 1371079_at   | Fc fragment of IgG, low affinity IIb, receptor (CD32)                               | Fcgr2b            | -1.28 |
| 1368000_at   | complement component 3                                                              | C3                | -1.25 |
| 1393250_at   | ---                                                                                 | ---               | -1.24 |
| 1392576_at   | similar to protein C33A12.3                                                         | RGD1359508        | -1.23 |
| 1399073_at   | OTU domain, ubiquitin aldehyde binding 1                                            | Otub1             | -1.23 |
| 1374962_at   | reticulon 4 interacting protein 1                                                   | Rtn4ip1           | -1.23 |

|              |                                                                                     |                   |       |
|--------------|-------------------------------------------------------------------------------------|-------------------|-------|
| 1377963_at   | ---                                                                                 | ---               | -1.23 |
| 1397375_at   | Acyl-CoA synthetase long-chain family member 5                                      | Acs15             | -1.23 |
| 1377338_at   | RAD1 homolog ( <i>S. pombe</i> )                                                    | Rad1              | -1.22 |
| 1380430_at   | ---                                                                                 | ---               | -1.22 |
| 1376843_at   | bone morphogenetic protein receptor, type II (serine/threonine kinase)              | Bmpr2             | -1.21 |
| 1374734_at   | Hypothetical protein LOC680254                                                      | LOC680254         | -1.20 |
| 1377899_at   | similar to RIKEN cDNA 2810025M15                                                    | RGD1304982        | -1.20 |
| 1370850_at   | sodium channel, voltage-gated, type III, beta                                       | Scn3b             | -1.19 |
| 1389467_at   | transmembrane protein 100                                                           | Tmem100           | -1.17 |
| 1367577_at   | heat shock protein 1                                                                | Hspb1             | -1.17 |
| 1394386_s_at | vacuolar protein sorting 52 homolog ( <i>S. cerevisiae</i> )                        | Vps52             | -1.16 |
| 1381993_at   | chloride intracellular channel 2                                                    | Clic2             | -1.16 |
| 1379433_at   | phosphoinositide-3-kinase, class 2, alpha polypeptide                               | Pik3c2a           | -1.16 |
| 1380332_at   | ---                                                                                 | ---               | -1.16 |
| 1367899_at   | coagulation factor II (thrombin) receptor                                           | F2r               | -1.15 |
| 1384127_at   | ---                                                                                 | ---               | -1.14 |
| 1373964_at   | glutaredoxin-like protein                                                           | LOC100174910      | -1.14 |
| 1388213_a_at | histocompatibility 2, T region locus 23 /// histocompatibility 2, T region locus 24 | H2-T23 /// H2-T24 | -1.14 |
| 1390685_at   | ---                                                                                 | ---               | -1.13 |
| 1370806_at   | retinol saturase (all trans retinol 13,14 reductase)                                | Retsat            | -1.13 |
| 1396117_at   | similar to leucine zipper protein 2                                                 | RGD1563838        | -1.13 |
| 1396259_at   | FRAS1 related extracellular matrix 3                                                | Frem3             | -1.12 |
| 1380383_at   | ADP-ribosylation factor 4-like                                                      | Arf4l             | -1.11 |
| 1372423_at   | PERP, TP53 apoptosis effector                                                       | Perp              | -1.10 |
| 1375862_at   | peroxidasin homolog ( <i>Drosophila</i> )                                           | Pxdn              | -1.09 |
| 1392582_at   | leucine rich repeat containing 4C                                                   | Lrrc4c            | -1.08 |
| 1390502_at   | similar to RIKEN cDNA 1700025G04 gene                                               | RGD1309104        | -1.07 |
| 1374173_at   | ---                                                                                 | ---               | -1.07 |
| 1392785_at   | ---                                                                                 | ---               | -1.06 |
| 1385706_at   | ---                                                                                 | ---               | -1.05 |
| 1393339_at   | ---                                                                                 | ---               | -1.04 |
| 1379486_at   | ---                                                                                 | ---               | -1.03 |
| 1393641_at   | B-cell linker                                                                       | Blnk              | -1.03 |
| 1370937_a_at | integrin alpha 7                                                                    | Itga7             | -1.00 |
| 1394097_at   | ---                                                                                 | ---               | -1.00 |
| 1387279_at   | F11 receptor                                                                        | F11r              | -0.99 |
| 1375600_at   | phosphatidylinositol glycan anchor biosynthesis, class O                            | Pigo              | -0.99 |
| 1392863_at   | ---                                                                                 | ---               | -0.97 |
| 1391406_at   | ---                                                                                 | ---               | -0.97 |
| 1383248_at   | flavin containing monooxygenase 5                                                   | Fmo5              | -0.96 |
| 1397349_at   | UBX domain containing 6                                                             | Ubx6              | -0.95 |
| 1390243_at   | ---                                                                                 | ---               | -0.95 |
| 1383401_at   | testis derived transcript                                                           | Tes               | -0.93 |
| 1390637_at   | ---                                                                                 | ---               | -0.93 |
| 1394392_at   | fat storage-inducing transmembrane protein 2                                        | Fitm2             | -0.92 |
| 1389419_at   | ---                                                                                 | ---               | -0.91 |

|              |                                                                      |            |       |
|--------------|----------------------------------------------------------------------|------------|-------|
| 1379435_at   | deoxyguanosine kinase                                                | Dguok      | -0.91 |
| 1369965_at   | mutL homolog 1 (E. coli)                                             | Mlh1       | -0.90 |
| 1390046_at   | tubulin, gamma complex associated protein 2                          | Tubgcp2    | -0.90 |
| 1383933_at   | Similar to KIAA0564 protein                                          | RGD1308772 | -0.89 |
| 1378440_at   | ---                                                                  | ---        | -0.88 |
| 1380981_at   | Stonin 2                                                             | Ston2      | -0.88 |
| 1383124_at   | ---                                                                  | ---        | -0.88 |
| 1392539_at   | biliverdin reductase B (flavin reductase (NADPH))                    | Blvrb      | -0.87 |
| 1378561_at   | ---                                                                  | ---        | -0.87 |
| 1369408_at   | deleted in bladder cancer 1 (human)                                  | Dbc1       | -0.85 |
| 1387163_at   | hypocretin                                                           | Hcrt       | -0.84 |
| 1377792_at   | ---                                                                  | ---        | -0.83 |
| 1378471_at   | ribonucleoprotein, PTB-binding 2                                     | Raver2     | -0.81 |
| 1376652_at   | complement component 1, q subcomponent, alpha polypeptide            | C1qa       | -0.81 |
| 1376885_at   | ---                                                                  | ---        | -0.81 |
| 1392715_at   | peroxisome proliferator-activated receptor gamma, coactivator 1 beta | Ppargc1b   | -0.81 |
| 1391125_at   | ---                                                                  | ---        | -0.80 |
| 1396383_at   | aldehyde dehydrogenase 3 family, member B1                           | Aldh3b1    | -0.80 |
| 1391998_at   | PHD finger protein 20-like 1                                         | Phf2011    | -0.79 |
| 1380850_at   | ---                                                                  | ---        | -0.79 |
| 1384310_at   | ---                                                                  | ---        | -0.79 |
| 1394179_s_at | ---                                                                  | ---        | -0.78 |
| 1396232_at   | ---                                                                  | ---        | -0.78 |
| 1380824_at   | Hook homolog 3 (Drosophila)                                          | Hook3      | -0.78 |
| 1393176_at   | ---                                                                  | ---        | -0.77 |
| 1371023_at   | multiple EGF-like-domains 8                                          | Megf8      | -0.77 |
| 1368696_at   | FXYD domain-containing ion transport regulator 7                     | Fxyd7      | -0.77 |
| 1372758_at   | ---                                                                  | ---        | -0.76 |
| 1367940_at   | chemokine (C-X-C motif) receptor 7                                   | Cxcr7      | -0.76 |
| 1389701_at   | ---                                                                  | ---        | -0.76 |
| 1381008_at   | ---                                                                  | ---        | -0.75 |
| 1368162_at   | cystatin E/M                                                         | Cst6       | -0.75 |
| 1389585_at   | ---                                                                  | ---        | -0.74 |
| 1376790_at   | ---                                                                  | ---        | -0.74 |
| 1388919_at   | zinc finger protein 541                                              | Znf541     | -0.74 |
| 1381515_at   | ---                                                                  | ---        | -0.74 |
| 1395087_at   | ---                                                                  | ---        | -0.74 |
| 1387973_at   | cytochrome P450, family 4, subfamily f, polypeptide 4                | Cyp4f4     | -0.74 |
| 1387493_at   | A kinase (PRKA) anchor protein 5                                     | Akap5      | -0.74 |
| 1368817_at   | proteasome (prosome, macropain) activator subunit 4                  | Psme4      | -0.74 |
| 1378580_at   | ---                                                                  | ---        | -0.73 |
| 1391889_at   | ---                                                                  | ---        | -0.73 |
| 1389735_at   | ribosomal protein S6 kinase polypeptide 6                            | Rps6ka6    | -0.73 |
| 1384250_a_at | ---                                                                  | ---        | -0.72 |
| 1367994_at   | dihydropyrimidine dehydrogenase                                      | Dpyd       | -0.72 |
| 1393302_at   | ---                                                                  | ---        | -0.71 |
| 1375640_at   | FK506 binding protein 9, 63 kDa                                      | Fkbp9      | -0.71 |
| 1373204_at   | transmembrane protein 176A                                           | Tmem176a   | -0.71 |

|              |                                                                               |                |       |
|--------------|-------------------------------------------------------------------------------|----------------|-------|
| 1368207_at   | FXYD domain-containing ion transport regulator 5                              | Fxyd5          | -0.71 |
| 1394961_at   | ---                                                                           | ---            | -0.71 |
| 1373440_at   | LYR motif containing 2 /// midasin homolog (yeast)                            | Lyrm2 /// Mdn1 | -0.70 |
| 1392947_at   | ---                                                                           | ---            | -0.70 |
| 1368426_at   | carnitine O-octanoyltransferase                                               | Crot           | -0.70 |
| 1376710_at   | ---                                                                           | ---            | -0.70 |
| 1391037_at   | von Willebrand factor A domain containing 5B2                                 | Vwa5b2         | -0.70 |
| 1393230_s_at | Similar to KIAA0564 protein                                                   | RGD1308772     | -0.69 |
| 1372958_at   | OTU domain, ubiquitin aldehyde binding 1                                      | Otub1          | -0.69 |
| 1371018_at   | cadherin, EGF LAG seven-pass G-type receptor 2 (flamingo homolog, Drosophila) | Celsr2         | -0.69 |
| 1368954_at   | phospholipase D2                                                              | Pld2           | -0.68 |
| 1372037_at   | PDZ and LIM domain 7                                                          | Pdlim7         | -0.68 |
| 1381311_at   | EGF-like module containing, mucin-like, hormone receptor-like 1               | Emr1           | -0.68 |
| 1374732_at   | hexamethylene bis-acetamide inducible 2                                       | Hexim2         | -0.68 |
| 1388344_at   | SAP domain containing ribonucleoprotein                                       | Sarnp          | -0.68 |
| 1385442_at   | ---                                                                           | ---            | -0.68 |
| 1397879_at   | ---                                                                           | ---            | -0.67 |
| 1368438_at   | phosphodiesterase 10A                                                         | Pde10a         | -0.67 |
| 1370891_at   | Cd48 molecule                                                                 | Cd48           | -0.67 |
| 1384780_at   | copine IV                                                                     | Cpne4          | -0.67 |
| 1393559_at   | ---                                                                           | ---            | -0.67 |
| 1369655_at   | phosphoinositide-3-kinase, class 3                                            | Pik3c3         | -0.67 |
| 1368467_at   | cytochrome P450, family 4, subfamily f, polypeptide 1                         | Cyp4f1         | -0.66 |
| 1376562_at   | similar to Traf2 and NCK interacting kinase, splice variant 4                 | RGD1561817     | -0.66 |
| 1389908_at   | ---                                                                           | ---            | -0.66 |
| 1390232_at   | similar to RIKEN cDNA 1810055G02                                              | RGD1311946     | -0.66 |
| 1395344_at   | myotubularin related protein 1                                                | Mtmr1          | -0.66 |
| 1389617_at   | ELK3, member of ETS oncogene family                                           | Elk3           | -0.66 |
| 1396392_at   | Dynactin 6                                                                    | Dctn6          | -0.65 |
| 1384291_at   | ---                                                                           | ---            | -0.65 |
| 1392702_at   | ---                                                                           | ---            | -0.64 |
| 1367995_at   | catalase                                                                      | Cat            | -0.64 |
| 1381612_at   | ---                                                                           | ---            | -0.63 |
| 1384163_at   | ---                                                                           | ---            | -0.63 |
| 1384541_at   | hyaluronan and proteoglycan link protein 1                                    | Hapln1         | -0.63 |
| 1370259_a_at | parathyroid hormone receptor 1                                                | Pthr1          | -0.62 |
| 1376956_at   | ---                                                                           | ---            | -0.62 |
| 1397528_at   | Splicing factor, arginine/serine-rich 2, interacting protein                  | Sfrs2ip        | -0.62 |
| 1372799_at   | deoxyguanosine kinase                                                         | Dguok          | -0.62 |
| 1391383_at   | cartilage acidic protein 1                                                    | Crtac1         | -0.61 |
| 1393214_at   | ---                                                                           | ---            | -0.60 |
| 1382204_at   | thyrotropin-releasing hormone degrading enzyme                                | Trhde          | -0.60 |
| 1377856_at   | ---                                                                           | ---            | -0.60 |
| 1373146_at   | synovial sarcoma, X breakpoint 2 interacting protein                          | Ssx2ip         | -0.60 |
| 1376576_at   | dual specificity phosphatase 11 (RNA/RNP complex 1-interacting)               | Dusp11         | -0.59 |
| 1382270_at   | ---                                                                           | ---            | -0.59 |



|            |                                                                                              |        |       |
|------------|----------------------------------------------------------------------------------------------|--------|-------|
| 1388337_at | nucleoside phosphorylase                                                                     | Np     | -0.59 |
| 1376635_at | ---                                                                                          | ---    | -0.59 |
| 1387345_at | proteasome (prosome, macropain) activator subunit 4                                          | Psme4  | -0.59 |
| 1389144_at | COMM domain containing 6                                                                     | Commd6 | -0.59 |
| 1368291_at | baculoviral IAP repeat-containing 2                                                          | Birc2  | -0.59 |
| 1390966_at | 1-acylglycerol-3-phosphate O-acyltransferase 6 (lysophosphatidic acid acyltransferase, zeta) | Agpat6 | -0.59 |

Supplementary Table S3. Relative quantitation of gene expression using quantitative real-time PCR.

| Gene   | $\Delta\Delta\text{Ct}$ SD | $\Delta\Delta\text{Ct}$ FSL | p value |
|--------|----------------------------|-----------------------------|---------|
| C3     | $1.13 \pm 0.07$            | $0.72 \pm 0.11$             | 0.02    |
| Tradd  | $0.54 \pm 0.06$            | $1.18 \pm 0.06$             | < 0.001 |
| Acs11  | $0.81 \pm 0.56$            | $1.00 \pm 0.05$             | 0.04    |
| Rnase4 | $1.79 \pm 0.12$            | $0.34 \pm 0.03$             | < 0.001 |

Real-time reverse transcription-polymerase chain reaction (RT-PCR) was used to confirm microarray results for a subset of selected genes from those demonstrating differential expression in the microarray analysis. mRNA was isolated as described in the materials and methods section. Samples were treated with DNase (RQ1 RNase-Free DNase; Promega Corporation, Madison, WI 53711 USA) for 30 minutes at 37°C. Next, 1  $\mu\text{l}$  of DNase Stop Solution was added to terminate to inactivate the DNase (10 minutes at 65°C). Reverse transcription of 1  $\mu\text{g}$  of each sample was performed with Applied Biosystems (Life Technologies Corporation, Carlsbad, CA, USA) High-Capacity cDNA reverse transcription kit according to the manufacturer's protocol. Quantitative PCR was carried out using Taqman probes and Taqman Universal PCR Master Mix from Applied Biosystems (Life Technologies Corporation, Carlsbad, CA, USA) on the ABI 7500 Real Time PCR system using the relative quantification ( $\Delta\Delta\text{Ct}$ ) method, with Gapdh RNA as the internal control. Data analysis of gene expression in Sprague-Dawley (SD; n = 4) and Flinder's Sensitive Line (n = 5) rats was carried out using the 7500 System SDS Software, with data normalized to a sample containing cDNA from all of the samples studied. Data from one SD animal was excluded as an outlier. Statistical comparisons were carried out by comparing  $\Delta\Delta\text{Ct}$  values for each group using two-tailed, unpaired t-tests.

Supplementary Table S4. BDI-II items that comprise the Cognitive-Affective and Somatic factors.

| Cognitive-Affective Factor | Somatic Factor                  |
|----------------------------|---------------------------------|
| 1. Sadness                 | 15. Loss of energy              |
| 2. Pessimism               | 16. Changes in sleeping pattern |
| 3. Past failure            | 17. Irritability                |
| 5. Guilty feelings         | 18. Changes in appetite         |
| 6. Punishment feelings     | 19. Concentration difficulty    |
| 7. Self-dislike            | 20. Tiredness or fatigue        |
| 8. Self-criticalness       | 21. Loss if interest in sex     |
| 9. Suicidal thoughts       |                                 |
| 10. Crying                 |                                 |
| 11. Agitation              |                                 |
| 14. Worthlessness          |                                 |
